# Supplementary material
Source: PubMed Central journal article supplement (PMC4185348)
Supplement: cr2014122x1.pdf [file cr2014122x1.pdf]

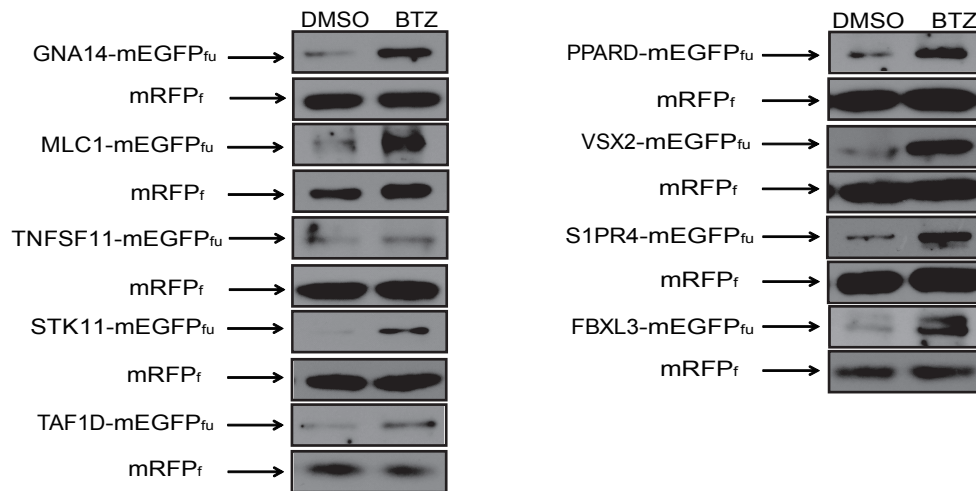

**Supplementary information, Figure S1** Immunoblotting analysis confirmed bortezomib induced changes in stability of individual fusion proteins.

The steady state levels of ORF-mEGFP<sub>fu</sub>-mRFP<sub>f</sub> proteins from cells treated with or without bortezomib were assessed with immunoblotting analysis using anti-FLAG.
