# Supplementary material
Source: PubMed Central journal article supplement (PMC4185348)
Supplement: cr2014122x2.pdf [file cr2014122x2.pdf]

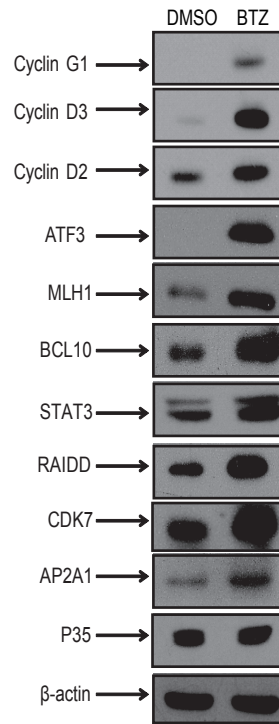

**Supplementary information, Figure S2** Immunoblotting analysis confirmed bortezomib-induced changes in stability of endogenous proteins.

The steady state levels of endogenous proteins in HEK293 FT cells, treated with or without bortezomib, were assessed with immunoblotting analysis using indicated antibodies.
