# Supplementary material
Source: PubMed Central journal article supplement (PMC4185348)
Supplement: cr2014122x3.pdf [file cr2014122x3.pdf]

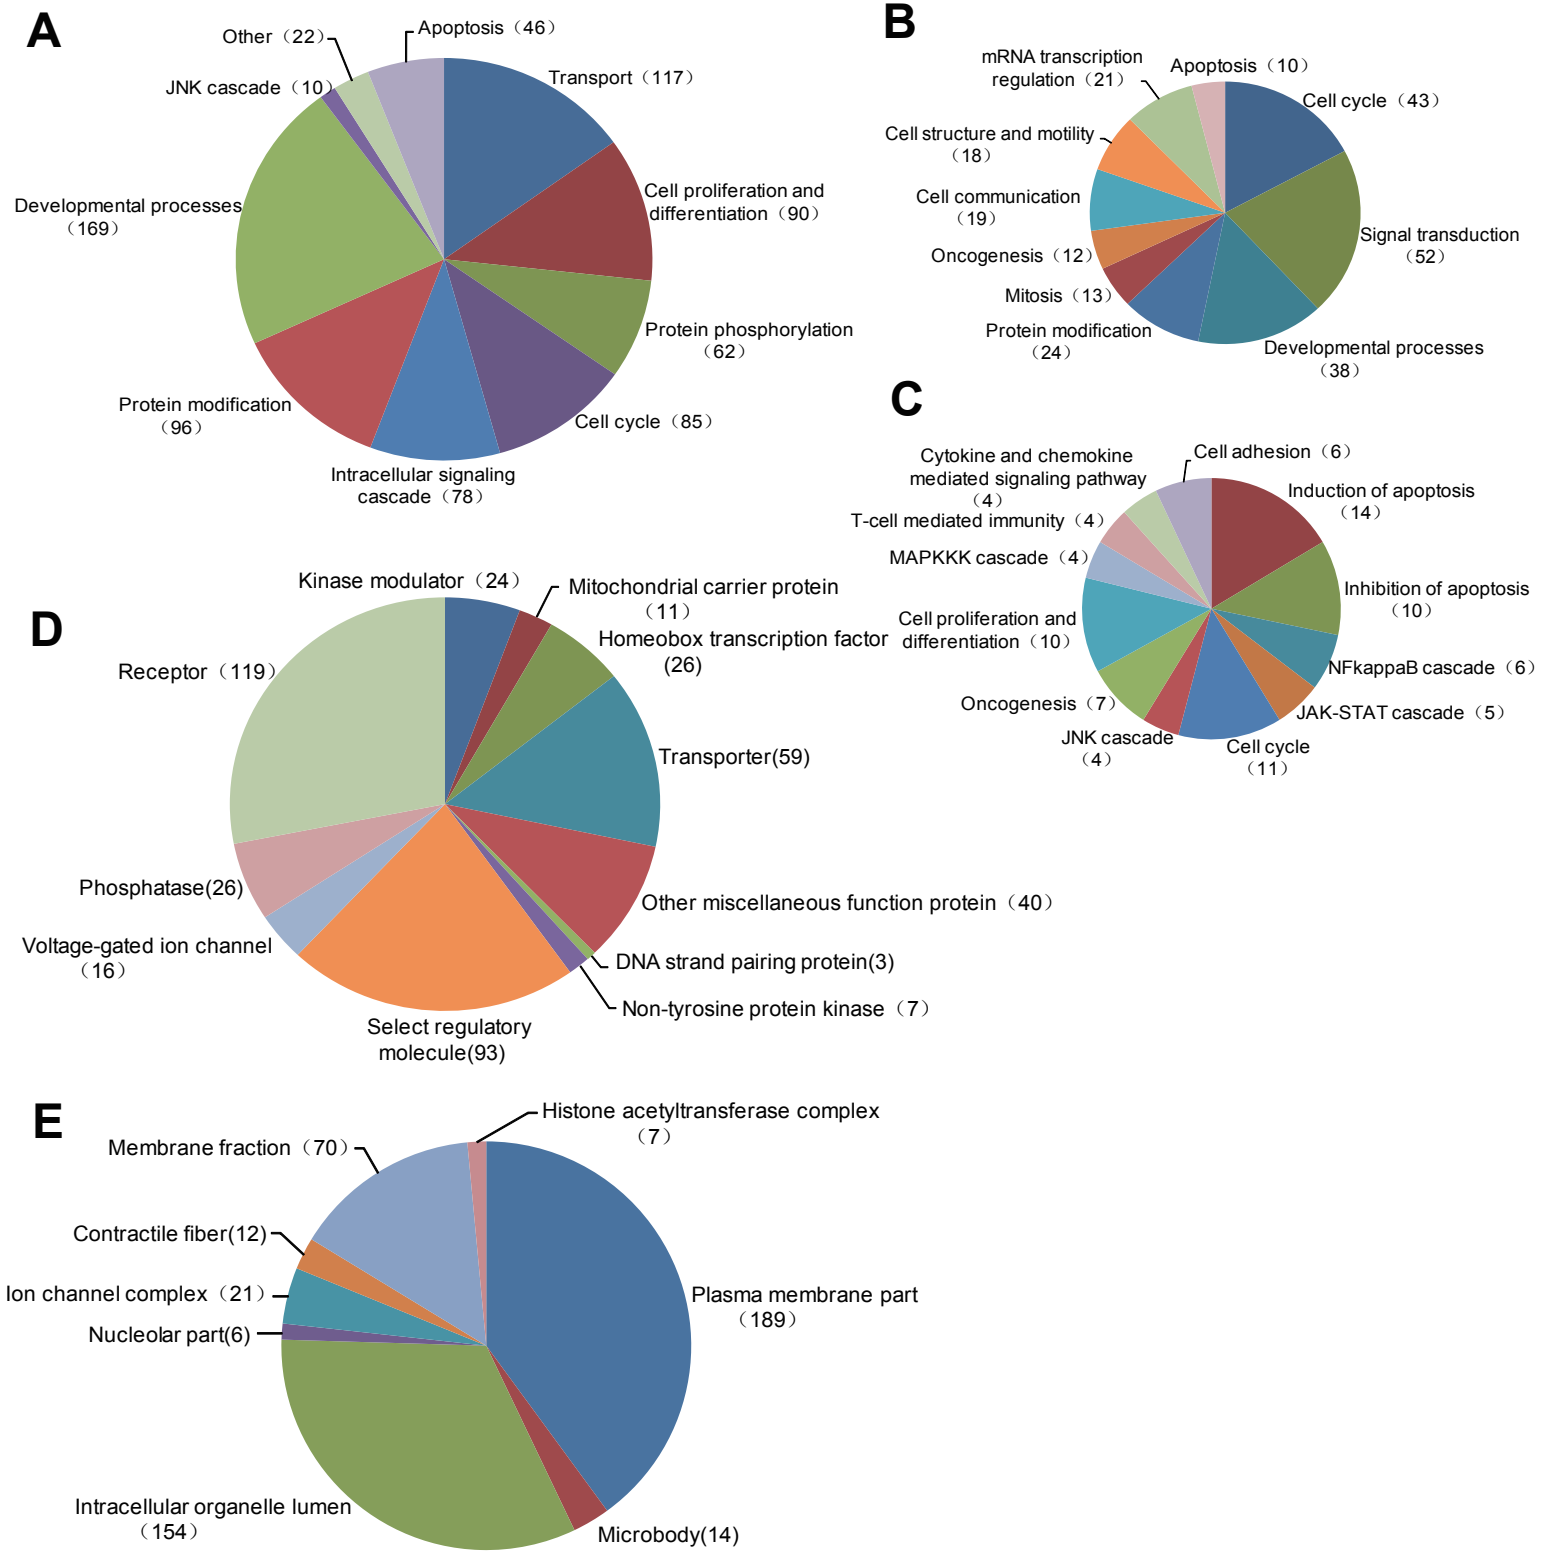

**Supplementary information, Figure S3** Categorization of bortezomib-induced changes in global protein stability.

Gene ontology (GO) analysis revealed the “functional gene categories” of the genes whose products were stabilized upon BTZ treatment (A). These genes were further categorized into the categories of “cell proliferation and differentiation” (B), “apoptosis” (C), and “an overview of recorded molecular function” (D), “subcellular localizations” (E).
