# Supplementary material
Source: PubMed Central journal article supplement (PMC4185348)
Supplement: cr2014122x4.pdf [file cr2014122x4.pdf]

- Module 1.** Regulation of ubiquitin-protein ligase activity involved in mitotic cell cycle
- Module 2.** DNA-dependent transcription, initiation
- Module 3.** Mitochondrial ATP synthesis coupled proton transport
- Module 4.** Chromatin modification
- Module 5.** Induction of apoptosis
- Module 6.** Regulation of fatty acid oxidation
- Module 7.** G-protein coupled receptor signaling pathway

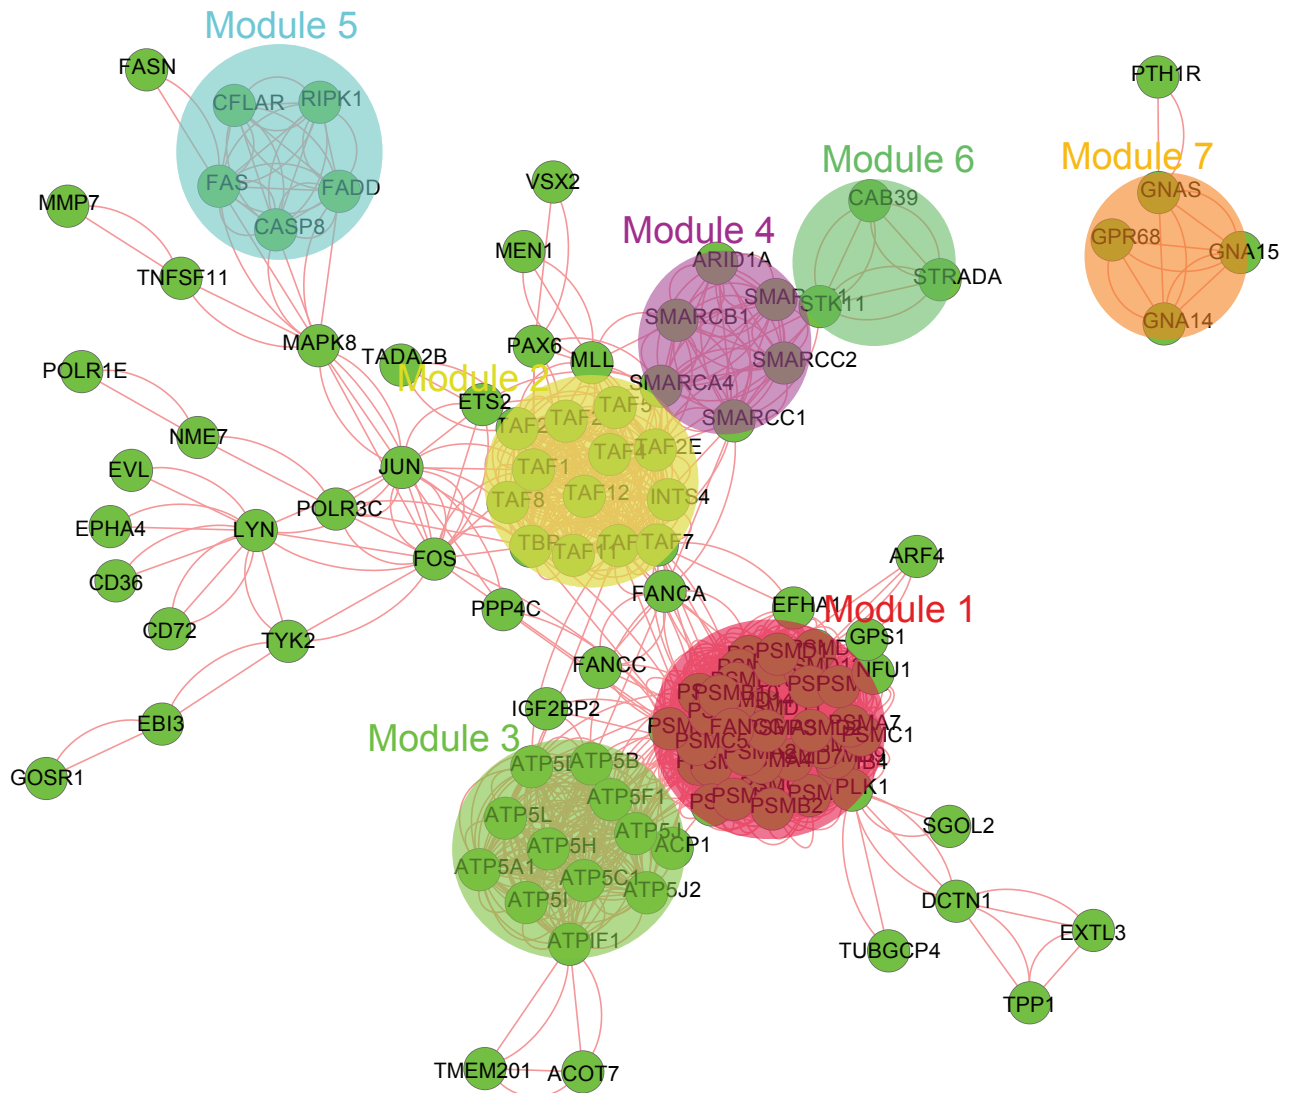

**Supplementary information, Figure S4** Protein-protein interaction (PPI) network analysis of bortezomib-induced changes in protein stability.

PPI network analysis with STRING categorized (500) genes whose products were most significantly stabilized upon BTZ treatment into several functional sub-network or modules (see “Methods” for definition). The sub-networks were visualized with Cytoscape.
