# Supplementary material
Source: PubMed Central journal article supplement (PMC4185348)
Supplement: cr2014122x5.pdf [file cr2014122x5.pdf]

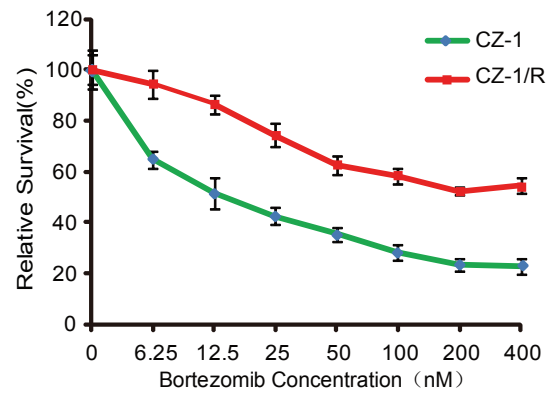

Supplementary information, **Figure S5** Characterization of BTZ-sensitive cells (CZ-1) or BTZ-resistant cells (CZ-1/R) from a multiple myeloma (MM) patient [48].

CZ-1 or CZ-1/R cells were treated with BTZ for 24 h at the indicated concentrations. Cell viability was determined using MTT assay, with the percentages of viable cells in the untreated control set as 100%.
