# Supplementary material
Source: PubMed Central journal article supplement (PMC4185348)
Supplement: cr2014122x6.pdf [file cr2014122x6.pdf]

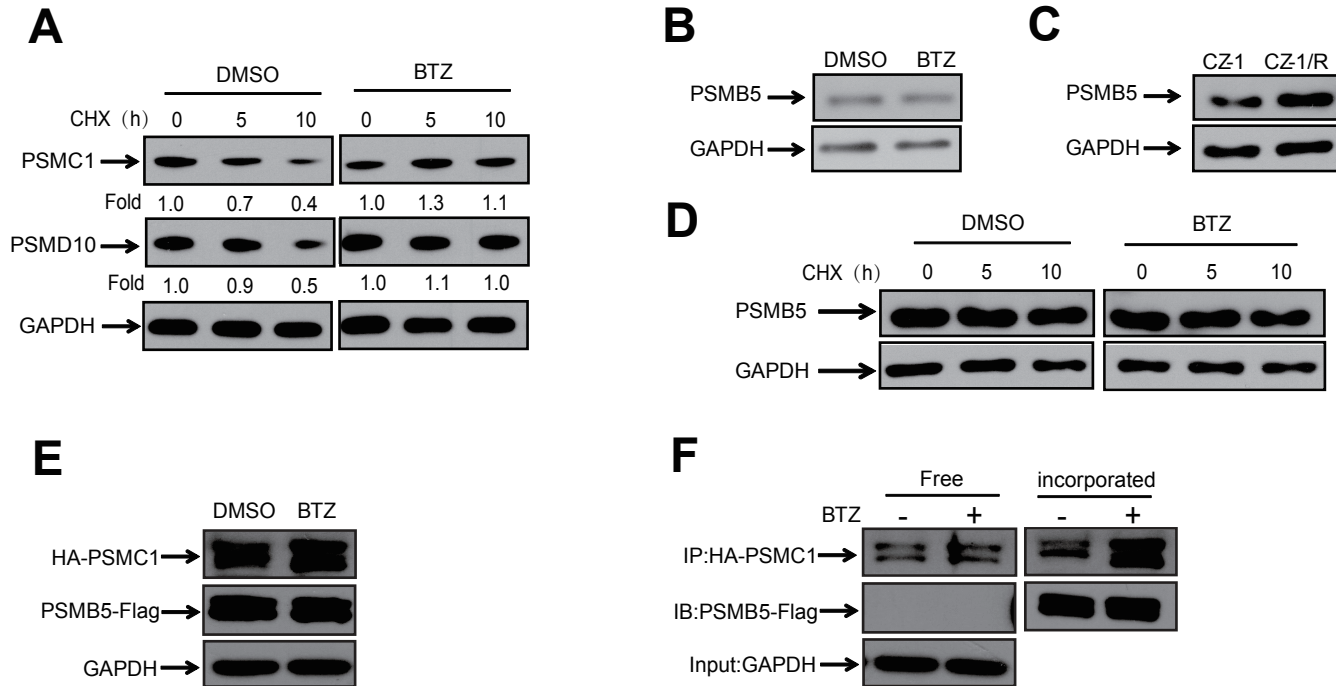

**Supplementary information, Figure S6**

(A) The stability of PSMC1 and PSMD10 were assayed by cycloheximide (CHX) chase in CZ-1 cells. (B) Level of endogenous PSMB5 proteins in CZ-1 was unaltered upon bortezomib treatment. (C) The basal levels of endogenous PSMB5 proteins were higher in drug-resistant CZ-1/R cells than in CZ-1 cells. (D) The stability of PSMB5 were assayed by cycloheximide (CHX) chase in CZ-1 cells. (E) The steady state levels of PSMB5-Flag and HA-PSMC1 proteins from cells treated with or without bortezomib were assessed with immunoblotting analysis. (F) Cell lysates were subjected to a Co-IP assay with anti-Flag beads and were subjected to immunoblotting analysis with anti-HA or anti-Flag antibodies.
