# Supplementary material
Source: PubMed Central journal article supplement (PMC4185348)
Supplement: cr2014122x7.pdf [file cr2014122x7.pdf]

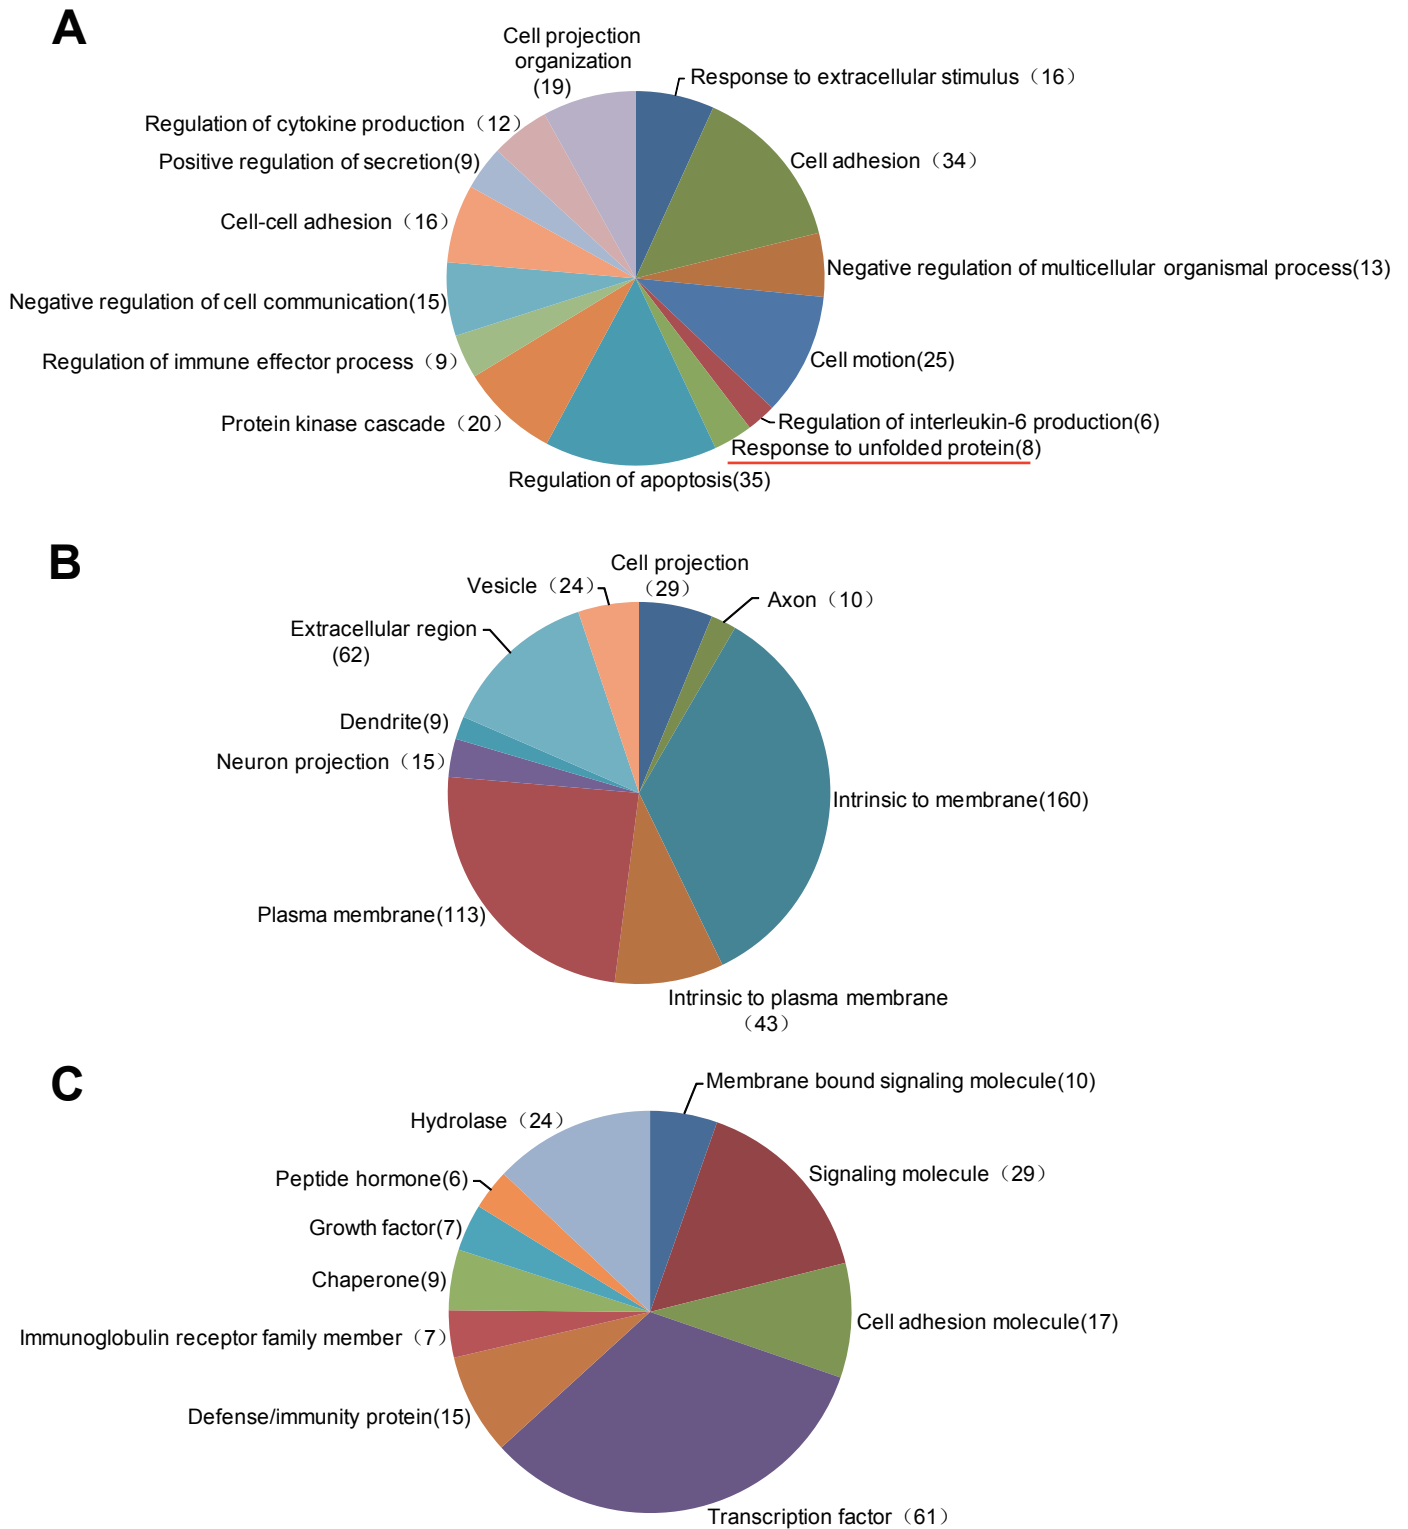

**Supplementary information, Figure S7** Categorization of bortezomib-induced changes in gene transcriptions.

Gene ontolog (GO) analysis categorized the (FC>3) genes whose transcriptions change most significantly upon BTZ treatment into the categories of “biological process” **(A)**, “subcellular localization” **(B)** and “molecular function” **(C)**.
