# Supplementary material
Source: PubMed Central journal article supplement (PMC4185348)
Supplement: cr2014122x8.pdf [file cr2014122x8.pdf]

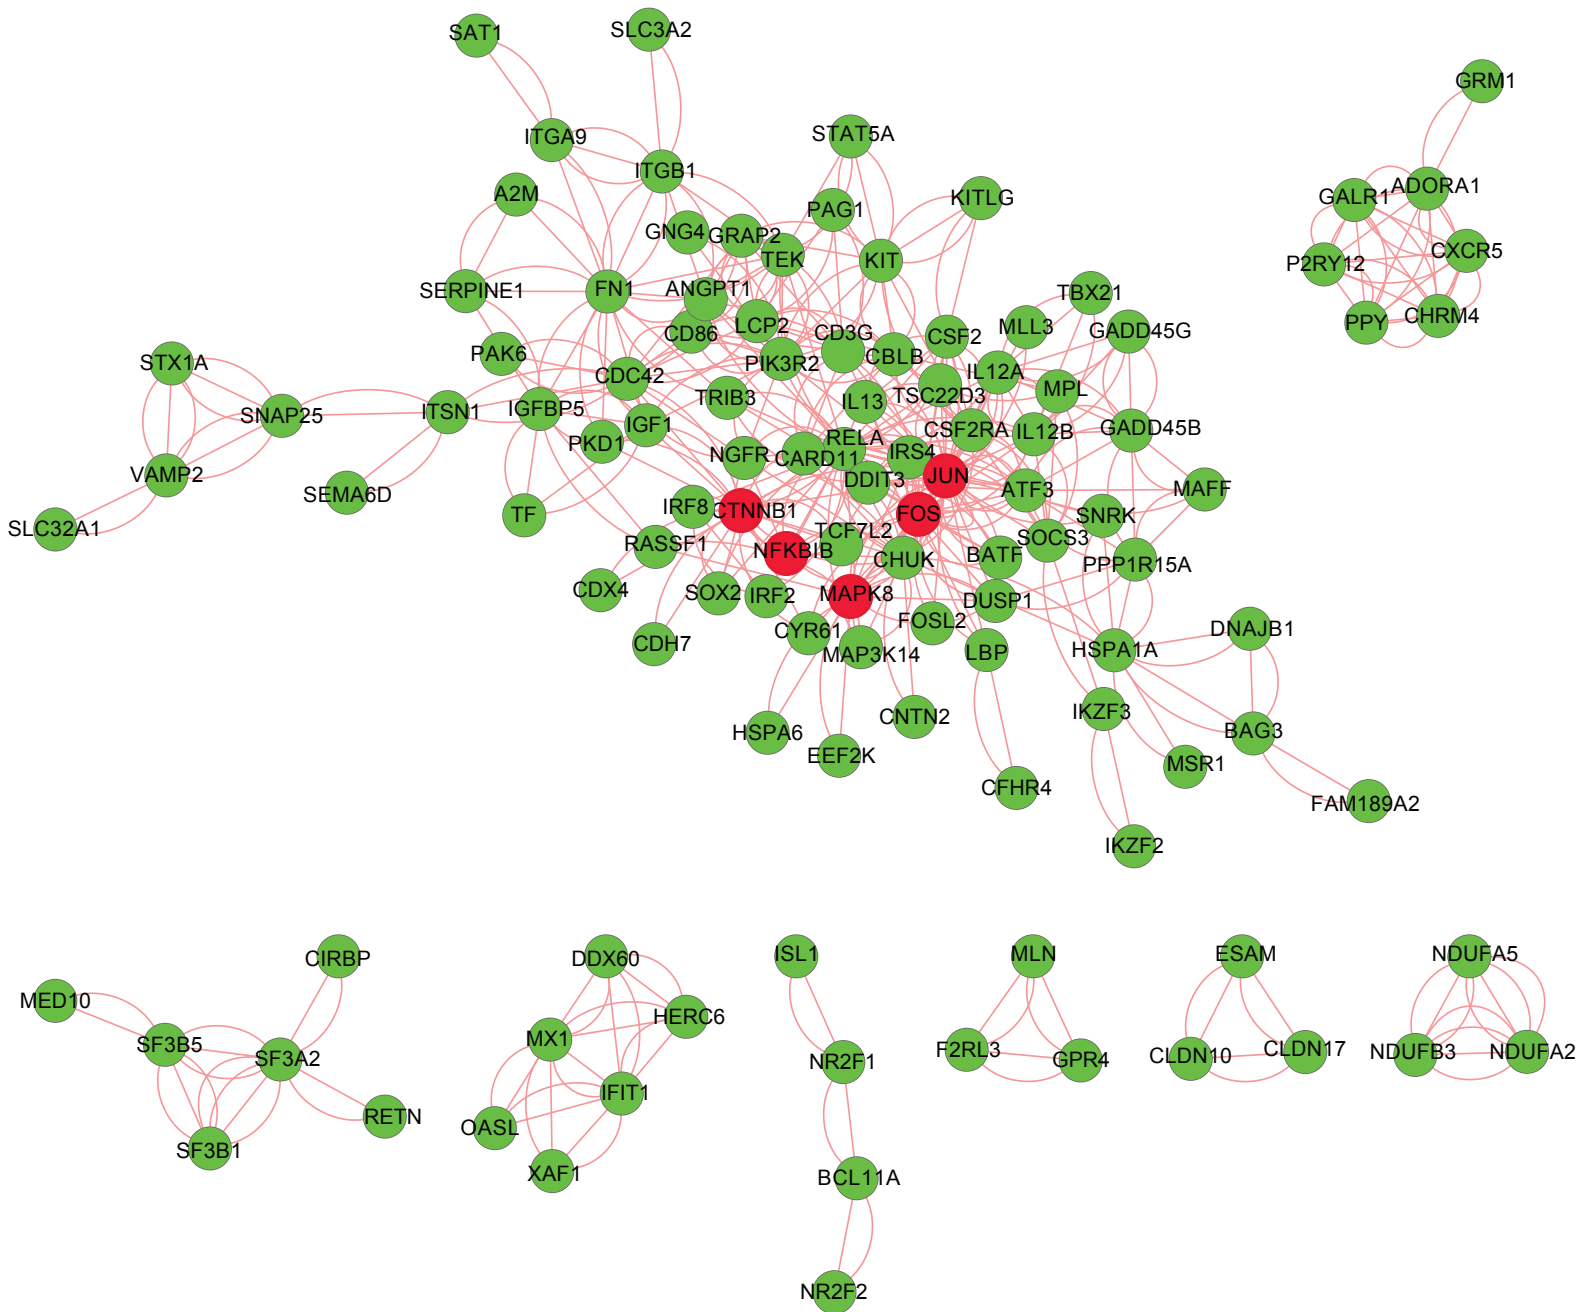

**Supplementary information, Figure S8** Protein-protein interaction (PPI) network analysis of bortezomib-induced changes in gene transcriptions.

PPI network analysis with STRING categorized the ( $FC > 3$ ) genes whose transcriptions changed most significantly upon BTZ treatment (see “Methods” for more details). The network was visualized with Cytoscape.
