# Supplementary material
Source: PubMed Central journal article supplement (PMC4185348)
Supplement: cr2014122x10.pdf [file cr2014122x10.pdf]

**A**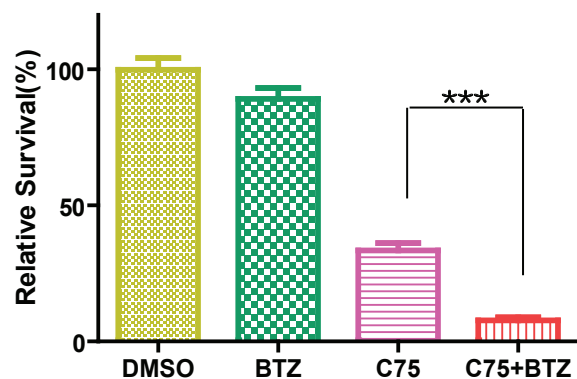**B**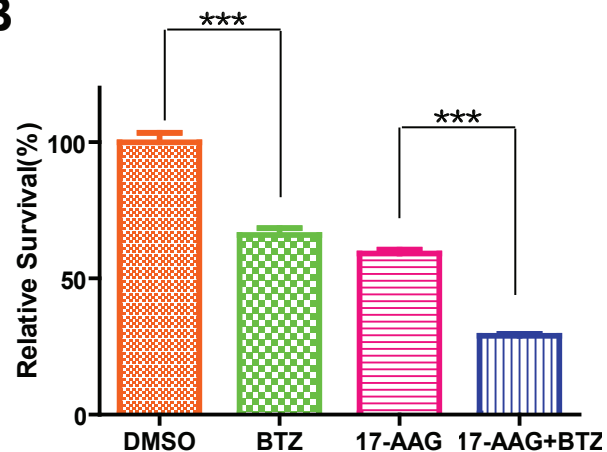

**Supplementary information, Figure S10** Combined chemotherapy using BTZ and drugs that targeted the ProTA identified key genes

BTZ-resistant CZ-1/R cells (**A**) were treated with 5 nM BTZ alone or in combination with 10  $\mu$ g/ml C75, 48h. BTZ-resistant CZ-1/R cells (**B**) were treated with 10 nM BTZ or in combination with 50  $\mu$ M 17-AAG, 48h. Viability of the myeloma cells in each group was assessed using MTT assay. Data were represented as mean  $\pm$ S.E.M (n = 6; \*, P < 0.1; n=6; \*\*\*, P < 0.0001).
