# Supplementary material
Source: PubMed Central journal article supplement (PMC4185348)
Supplement: cr2014122x11.pdf [file cr2014122x11.pdf]

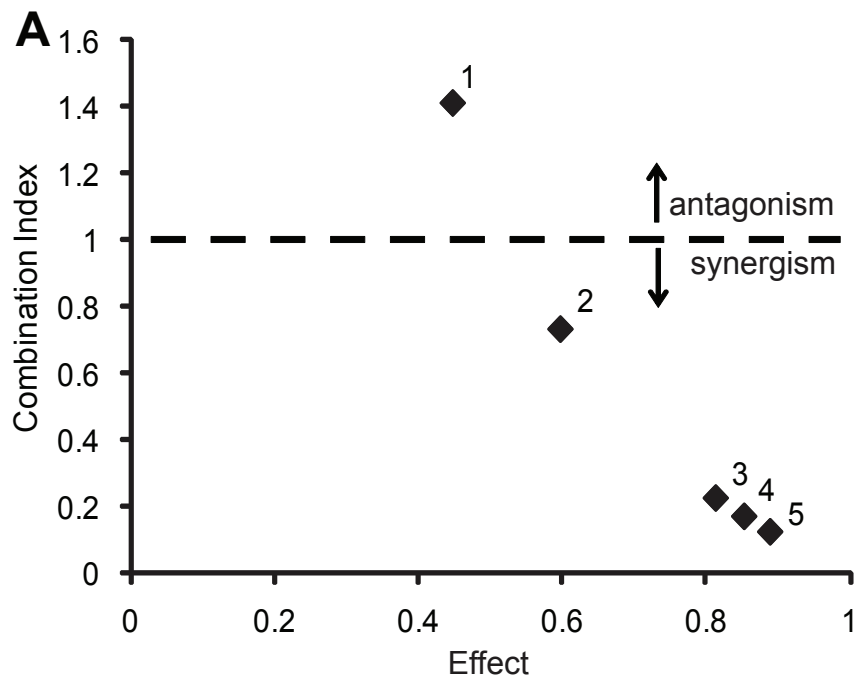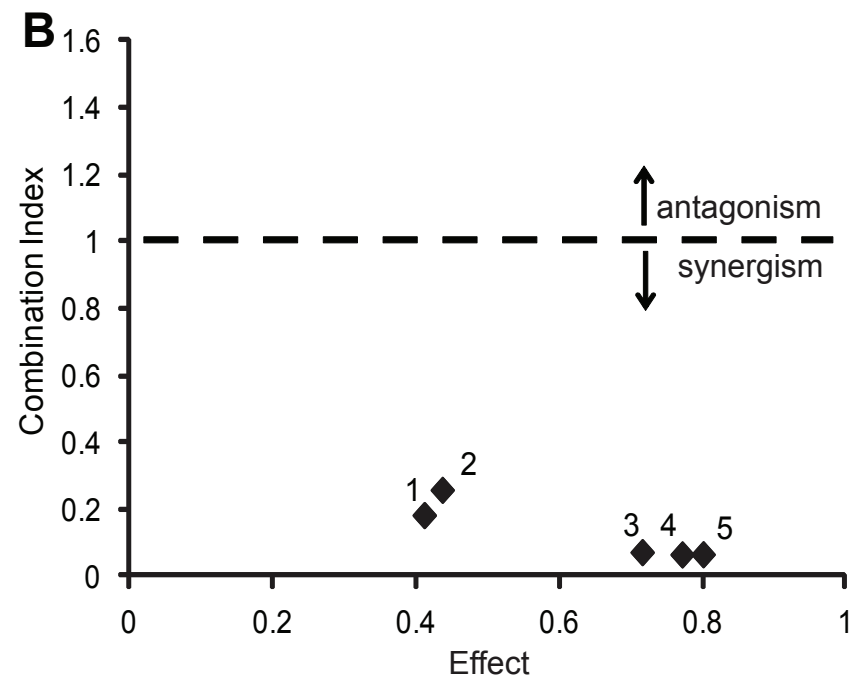

| Combination (CZ-1) | C75 (ug/ml) | BTZ (nM) | CI    |
|--------------------|-------------|----------|-------|
| 1                  | 10          | 1        | 1.414 |
| 2                  | 10          | 5        | 0.732 |
| 3                  | 10          | 10       | 0.223 |
| 4                  | 10          | 15       | 0.168 |
| 5                  | 10          | 20       | 0.121 |

| Combination (CZ-1) | 17-AAG (uM) | BTZ (nM) | CI    |
|--------------------|-------------|----------|-------|
| 1                  | 50          | 1        | 0.195 |
| 2                  | 50          | 5        | 0.270 |
| 3                  | 50          | 10       | 0.084 |
| 4                  | 50          | 15       | 0.077 |
| 5                  | 50          | 20       | 0.078 |

**Supplementary information, Figure S11** C75, 17-AAG and BTZ exhibit synergistic, cytotoxic effects on the MM cell line CZ-1

(A) CZ-1 cells were exposed to BTZ alone or in combination with 10  $\mu\text{g/ml}$  of C75 for 24 h, and survival was assessed by an MTT assay (B) CZ-1 cells were exposed to BTZ alone or in combination with 50  $\mu\text{M}$  of 17-AAG for 24 h, and survival was assessed by an MTT assay. The combination index plots (CI) were generated by CompuSyn software (<http://www.combosyn.com/>) based upon the Chou-Talalay method. The dashed line indicates additive affect (CI = 1). Antagonism (above dashed line) and synergism (below dashed line). Tables are included to provide the drug concentrations tested.
